# Supplementary material for: Writing of H3K4Me3 overcomes epigenetic silencing in a sustained but context-dependent manner
Source: PubMed Central journal article supplement (PMC4987519; doi:10.1038/ncomms12284), 2016-08-10
Supplement: ncomms12284-s1.pdf [file ncomms12284-s1.pdf]

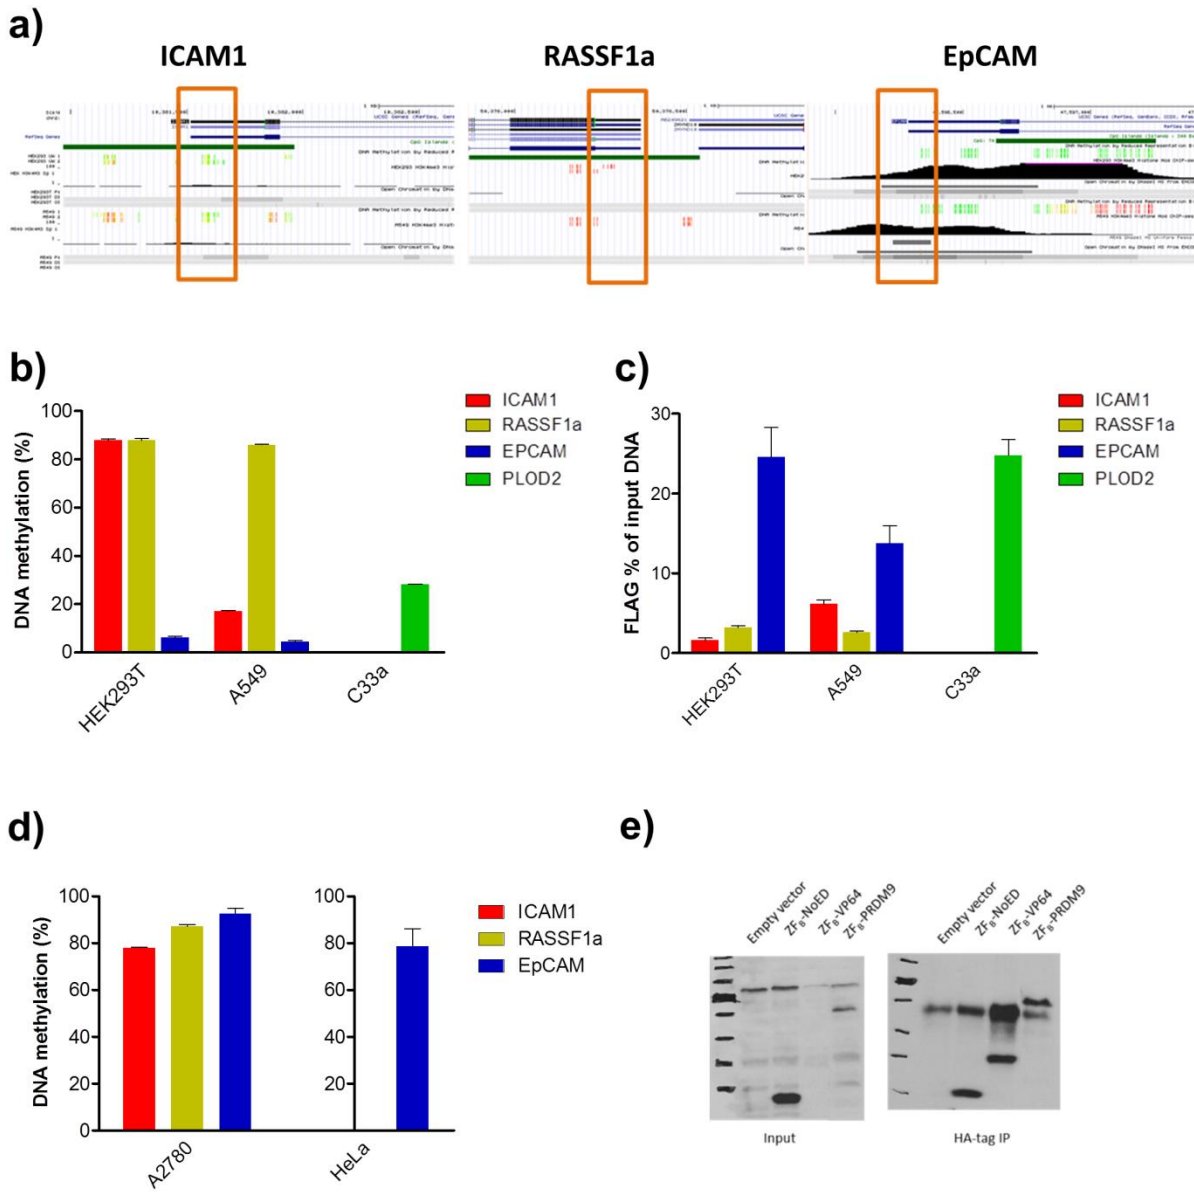

**Supplementary Figure 1** Epigenetic landscape of target genes in the studied cell lines (a) ENCODE data depicting the promoter and first exon of the three genes in question. Dark green bars represent the CpG island; light green (unmethylated), yellow (partially methylated) or red (hypermethylated) bars represent DNA methylation profiles; black represent the H3K4me3 peaks of HEK293 and A549; in orange the region targeted with gRNAs (b) DNA methylation levels determined by pyrosequencing of the promoter area. Bars represent the mean methylation of 7-10 CpGs (c) FLAG ChIP-qPCR enrichment at the promoter region of 4 genes compared to levels of DNA methylation in three different cell lines (d) DNA methylation levels determined by pyrosequencing of the promoter area of A2780 (all genes) and HeLa (EpCAM). Bars represent the mean methylation of 7-10 CpGs (e) Protein expression of ZF-fusions in A2780 cells. ( $n = 3$  independent experiments; error bars  $\pm$  s.d.)

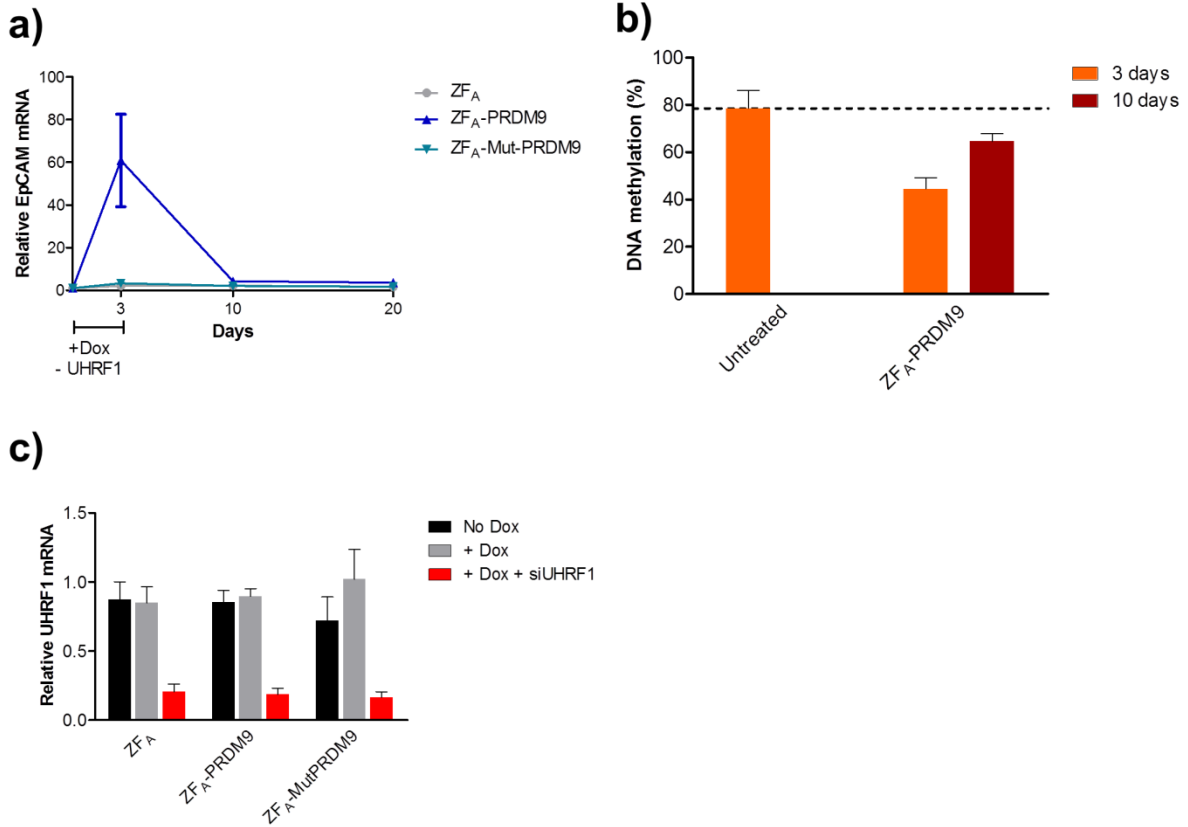

**Supplementary Figure 2** Downregulation of key regulator of epigenetic memory through maintenance of DNA methylation after replication (a) Relative *EpCAM* mRNA expression, at each specific time point after Dox and downregulation of UHRF1 for 3 days (b) DNA methylation levels determined by pyrosequencing of the promoter area. Bars represent the mean methylation of 7-10 CpGs (c) Relative *UHRF1* expression after siRNA treatment in all the stable cell lines and treatments. ( $n = 3$  independent experiments; error bars  $\pm$  s.d.)

a)

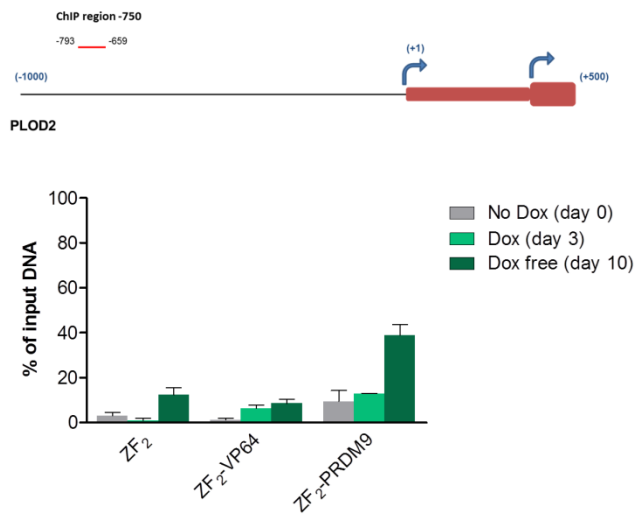

**Supplementary Figure 3** Spreading of H3K4me3 750 bps upstream of targeting region (a) H3K4me3 ChIP-qPCR enrichment at the region 750 bps upstream of the PLOD2 promoter. ( $n = 3$  independent experiments; error bars  $\pm$  s.d.)

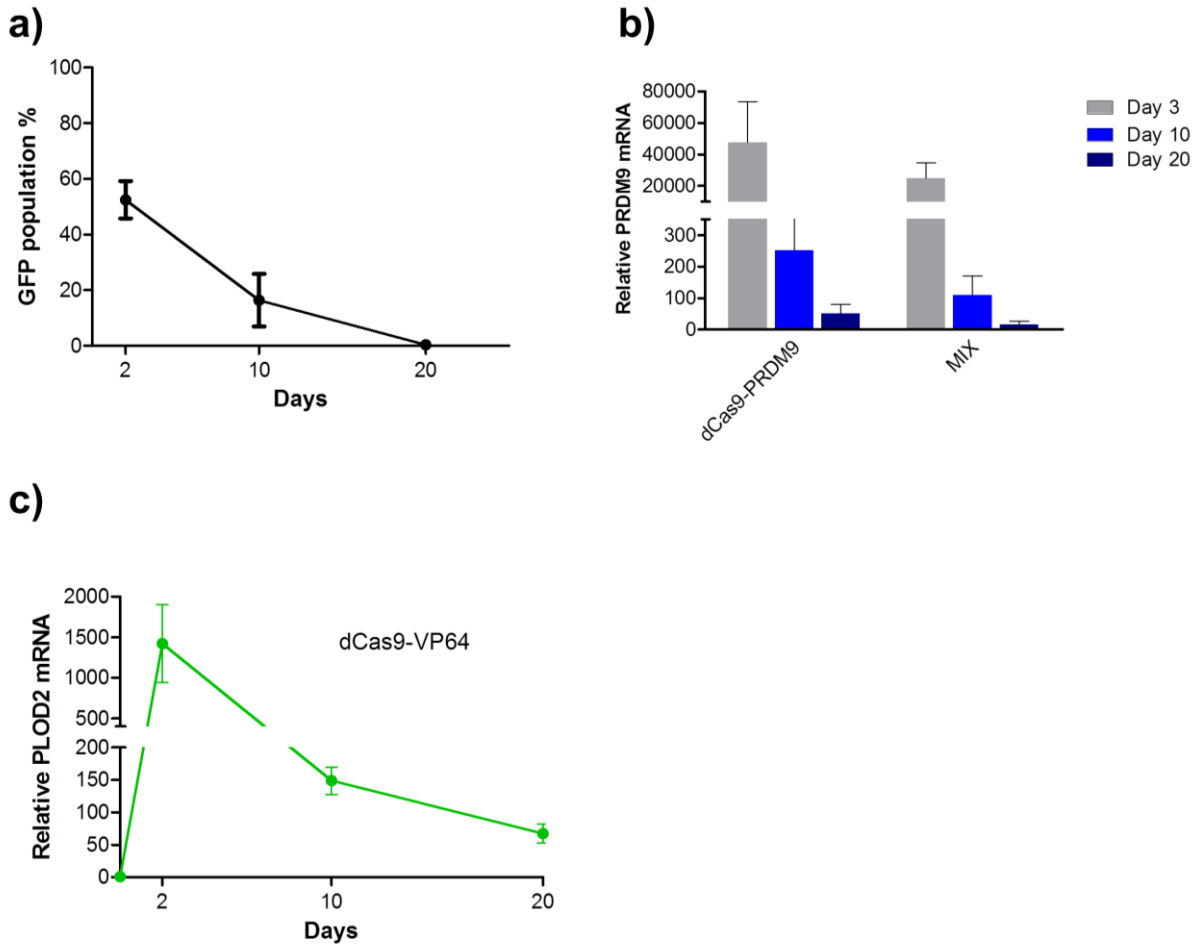

**Supplementary Figure 4** (a) Transfection efficiency and transition after subculturing for C33a cells measured as GFP using a CMV-GFP plasmid. (b) Relative expression of PRMD9 in Hela cells treated with 5aza and transfected with the dCas9-effector domains shows the loss of PRDM9 expression (c) Relative PLOD2 mRNA, after co-transfection in C33a cells of dCas9 –VP64 and a combination of gRNAs. ( $n = 3$  independent experiments; error bars  $\pm$  s.d.)

**Supplementary Table 1.** Primers for effector domain amplification.

| Effector domain primers |                                      |                                                  |
|-------------------------|--------------------------------------|--------------------------------------------------|
| Target                  | Forward Primer (5'-3')               | Reverse Primer (5'-3')                           |
| PRDM9                   | CTGACGCGTATGGCCTTAAGAGTGGAACA        | GGTTAATTAAGAGGAGTGATTGCGTTCTA                    |
| DOT1L                   | TTAACGCGTGGGGAGAAGCTGGAGCTG          | CGTTAATTAATTGGTCTTCTTGGGCTT                      |
| UBE2A                   | TTAACGCGTATGTCCACCCCGGCTCGG          | CGTTAATTAACAATCACGCCAGCTTTG                      |
| MutPRDM9                | CTTTGGCCCTTATGAGGCCGAATTACAGAAGACG   | CGTCTTCTGTAATTCGGGCTCATAAGGGCCAAAAG              |
| MutDOT1L                | CACCTCAGGACCAAAGGCAAATCAGCCACAAATATA | CCAACACGAGTGTATATTTGTGGCTGATTTTGCCTTTGGTCTGAGGTG |

**Supplementary Table 2.** gRNA information (in bold the regions shared between gRNA and zinc finger proteins).

| <i>Sp</i> -dCas9 |                              |                                         |
|------------------|------------------------------|-----------------------------------------|
| Target Location  | Protospacer Sequence (5'-3') | Genomic Location (GRCh38/hg19 Assembly) |
| EPCAM A+         | CAGCGCCGGGGCTGGGGGAG         | Chr2: 47,369,152-47,369,172             |
| EPCAM A-         | <b>CCAGCCCCGGCGCTGCAGTT</b>  | Chr2: 47,369,147-47,369,167             |
| EPCAM B+         | <b>CTACTCACTCCCCAACTCC</b>   | Chr2: 47,369,179-47,369,198             |
| EPCAM B-         | <b>CGGGAGTTGGGGGAGTGAGT</b>  | Chr2: 47,369,181-47,369,200             |
| ICAM C+          | <b>CGGAGCTGAAGCGGCCAGCG</b>  | Chr19: 10,270,941-10,270,961            |
| ICAM C-          | <b>CTCGCTGGCCGCTTCAGCTC</b>  | Chr19: 10,270,944-10,270,963            |
| RASSF1a X+       | <b>TGTGAGGAGGGGACGAAGGA</b>  | Chr3: 50,341,033-50,341,052             |
| RASSF1a X-       | <b>TCCTCACACCCACCCCGGA</b>   | Chr3: 50,341,045-50,341,064             |
| RASSF1a Z+       | <b>TGGGGGAGGCGCTGAAGTCG</b>  | Chr3: 50,340,881-50,340,900             |
| RASSF1a Z-       | <b>CCGACTTCAGCGCTCCCCC</b>   | Chr3: 50,340,880-50,340,899             |
| RASSF1a Y+       | AAGGAAGGGCAAGGCGGGGG         | Chr3: 50,341,010-50,341,029             |
| PLOD2 g2         | <b>GCTGTGGAAGCTACCGGGGC</b>  | Chr3: 146,161,525-146,161,544           |
| PLOD2 g1         | CCACTCCCAAAGCTAAGTGC         | Chr3: 146,161,426-146,161,445           |
| PLOD2 g3         | GAGCCTCCACACGTAGCCGC         | Chr3: 146,161,374-146,161,393           |
| PLOD2 g3         | TGAGCAAACAGTCCAGACGT         | Chr3: 146,161,327-146,161,346           |

**Supplementary Table 3.** Zinc finger information.

| ZFP             |                           |                                         |
|-----------------|---------------------------|-----------------------------------------|
| Target Location | Target site (5'-3')       | Genomic Location (GRCh38/hg19 Assembly) |
| EPCAM A         | <b>GCCGGGGCTGGGGGAGGG</b> | Chr2: 47,369,157-47,369,174             |
| EPCAM B         | <b>ACTCACTCCCCAACTCC</b>  | Chr2: 47,369,181-47,369,198             |
| ICAM CD54       | <b>TCCGGAGCTGAAGCGGCC</b> | Chr19: 10,270,940-10,270,957            |
| RASSF1a X       | <b>GGAGGGGACGAAGGAGGG</b> | Chr3: 50,341,030-50,341,047             |
| RASSF1a Z       | <b>GGCGCTGAAGTCGGGGCC</b> | Chr3: 50,340,876-50,340,893             |
| PLOD2 ZF2       | <b>GAGGCTGCTGTGGAAGCT</b> | Chr3: 146,161,533-146,161,550           |
| PLOD2 ZF8       | <b>GGGGCCGTGGGCGCCTGA</b> | Chr3: 146,161,016-146,161,033           |

**Supplementary Table 4.** Quantitative reverse transcription PCR

| qRT-PCR primers |                        |                        |                          |
|-----------------|------------------------|------------------------|--------------------------|
| Target          | Forward Primer (5'-3') | Reverse Primer (5'-3') | Probe                    |
| GAPDH           | CCACATCGCTCAGACACCAT   | GCGCCCAATACGACCAAAT    | CGTTGACTCCGACCTTCACCTCCC |
| RASSF1a         | AAGTTCACCTGCCACTACCG   | AAGGTCAGGTGTCTCCCACT   |                          |
| PLOD2           | GGGAGTTCATTGCACCAAGTT  | GAGGACGAAGAGAACGC      |                          |

## Supplementary Table 5. ChIP-qPCR primers

| Target                 | ChIP primers           |                        |                      |
|------------------------|------------------------|------------------------|----------------------|
|                        | Forward Primer (5'-3') | Reverse Primer (5'-3') | Probe                |
| EPCAM ChIP             | CCCAACTCCCGGGCGTGACT   | TGTCCTCCGACCGGACCC     |                      |
| RASSF1a ChIP           | TGGGGTGTGAGGAGGGGACGA  | AGAGCCGCGCAATGGA       |                      |
| PLOD2 ChIP region 2    | GAGGCTGCTGTGGAAGCTA    | GGTTTGGGAGAGGGAGGAG    | AGACGGGAACACCGCCCTCC |
| PLOD2 ChIP region 8    | CACCGACGACCTCACTCA     | TCGCGAGAACGCAGAGAC     | CTGCGTTACGGGCCGCTC   |
| PLOD2 ChIP region -750 | ACAAAACGTGATCATAATGGAA | ATTTAGCGAGGAGATCCAGAA  |                      |

## Supplementary Table 6. Pyrosequencing primers

| Target    | Pyrosequencing primers     |                                                  |                         |
|-----------|----------------------------|--------------------------------------------------|-------------------------|
|           | Forward Primer (5'-3')     | Reverse Primer (5'-3')                           | Pyrosequencing          |
| ICAM1     | GGGGAAGTTGGTAGTATTTAAAAGT  | [Btn] CCTTCCCCTCCAAACAATACTACAATTA               | GTTAGATTGTTTGTAGT       |
| EPCAM     | TGGGGGAGGGGAGTTTATT        | [Btn] ACCCAACTCCACAACCTCT                        | AGGGGAGTTTATTTATTTTTTTA |
| RASSF1a   | AAGGAGGGAAGGAAGGTAAG       | gggacaccgctgatcggttaCCCCCAACTCAATAAACTCAAACCTCCC | GAAGGAAGGGTAAGG         |
| PLOD2     | AAGTAGTGGGGTTAAGG          | [Btn] CCAAAAAAACCTTAAACTCTTTCCAATAAT             | GGGTTAAGGTTTAGAGA       |
| Universal | [Btn] gggacaccgctgatcggtta |                                                  |                         |

**Supplementary Note 1.** CCDS Sequences of amplified epigenetic enzymes (in-between green is amplified region, in red the nucleotides changed for site directed mutagenesis)

**PRDM9**

ATGAGCCCTGAAAAGTCCCAAGAGGAGAGCCCAGAAGAAGACACAGAGAGAACAGAGCGGAAGCCCATGGT  
CAAAGATGCCTTCAAAGACATTTCCATATACTTCACCAAGGAAGAATGGGCAGAGATGGGAGACTGGGAGAA  
AACTCGCTATAGGAATGTGAAAAGGAACTATAATGCACTGATTACTATAGGTCTCAGAGCCACTCGACCAGCT  
TTCATGTGTCACCGAAGGCAGGCCATCAAACCTCAGGTGGATGACACAGAAGATTCTGATGAAGAATGGACC  
CCTAGGCAGCAAGTCAAACCTCCTTGG **AGGCTTAAAGGCTGGAACT** GCGTAAACACCAGAAGGGAATGCC  
CAAGGCGTCATTAGTAATGAATCTAGTTTGAAGAATTGTCAAGAACAGCAAATTTACTGAATGCAAGTGGC  
TCAGAGCAGGCTCAGAAACCAGTGTCCCCTTCTGGAGAAGCAAGTACCTCTGGACAGCACTCAAGACTAAAA  
CTGGAACTCAGGAAGAAGGAGACTGAAAGAAAGATGTATAGCCTGCGAGAAAGAAAGGGTCTATGCATACAAA  
GAGGTCAGCGAGCCGCAGGATGATGATTACCTCTATTGTGAGATGTGTCAGAACTTCTTCATTGACAGCTGT  
GCTGCCATGGGCCCCCTACATTTGTAAAGGACAGTGCAGTGGACAAGGGGCACCCCAACCGTTCAGCCCT  
CAGTCTGCCCCAGGGCTGAGAATTGGGCCATCAGGCATCCCTCAGGCTGGGCTTGAGTATGGAATGAGG  
CATCTGATCTGCCGCTGGGTCTGCACTTTGGCCCTTATGAG **GGC**CGAATTACAGAAGACGAAGAGGCAGCC  
AACAATGGATACTCCTGGCTGATC**ACCAAGGGGAGAAACTGCTATGAGTATGTGGATGGAAAAGATAAATCC**  
**TGGGCCAACTGGATGAG**GTATGTGAACTGTGCCCGGATGATGAAGAGCAGAACCTGGTGGCCTTCCAGTA  
CCACAGGCAGATCTTCTATAGAACCTGCCGAGTCATTAGGCCAGGCTGTGAACTGCTGGTCTGGTATGGGG  
ATGAATACGGCCAGGAAGTGGGCATCAAGTGGGGCAGCAAGTGAAGAAAGAGCTCATGGCAGGGAGAGA  
ACCAAAGCCAGAGATCCATCCATGTCCCTCATGCTGTCTGGCCTTTTCAAGTCAGAAATTTCTCAGTCAACAT  
G **TACAGCCCAATCAATCTCTCT** CAGAACTTCCCAGGACCATCTGCAAGAAAACCTCCCAACCAGAGAATCCC  
TGCCAGGGGATCAGAATCAGGAGCAGCAATATCCAGATCCACACAGCCGTAATGACAAAACCAAAGGTCAA  
GAGATCAAAGAAAGGTCCAAACTCTTGAATAAAAGGACATGGCAGAGGGAGATTTCAAGGGCCTTTTCTAGC  
CCACCCAAAGGACAAAATGGGGAGCTGTAGAGTGGGAAAAAGAATAATGGAAGAAGAGTCCAGAACAGGCCA  
GAAAGTGAATCCAGGGAACACAGGCAAATTTATTTGTGGGGTAGGAATCTCAAGAAATTGCAAAAGTCAAGTA  
TGGAGAGTGTGGACAAGGTTTTCAGTGTAAATCAGATGTTATTACACACCAAAGGACACATACAGGGGAGAA  
GCTCTACGTCTGCAGGGAGTGTGGGCGGGGCTTTAGCTGGAAGTCACACCTCCTCATTACACCAGAGGATAC  
ACACAGGGGAGAAGCCCTATGTCTGCAGGGAGTGTGGGCGGGGCTTTAGCTGGCAGTCAGTCTCCTCACT  
CACCAGAGGACACACACAGGGGAGAAGCCCTATGTCTGCAGGGAGTGTGGGCGGGGCTTTAGCCGGCAGT  
CAGTCTCCTCACTCACCAGAGGAGACACACAGGGGAGAAGCCCTATGTCTGCAGGGAGTGTGGGCGGGG  
CTTTAGCCGGCAGTCACTCCTCCTCACTCACCAGAGGAGACACACAGGGGAGAAGCCCTATGTCTGCAGGG  
AGTGTGGGCGGGGCTTTAGCTGGCAGTCAGTCTCCTCACTCACCAGAGGACACACACAGGGGAGAAGCC  
CTATGTCTGCAGGGAGTGTGGGCGGGGCTTTAGCTGGCAGTCAGTCTCCTCACTCACCAGAGGACACACA  
CAGGGGAGAAGCCCTATGTCTGCAGGGAGTGTGGGCGGGGCTTTAGCAATAAGTCACACCTCCTCAGACAC  
CAGAGGACACACACAGGGGAGAAGCCCTATGTCTGCAGGGAGTGTGGGCGGGGCTTTTCGCGATAAGTCAC  
ACCTCCTCAGACACCAGAGGACACACACAGGGGAGAAGCCCTATGTCTGCAGGGAGTGTGGGCGGGGCTT  
TAGAGATAAGTCAAACCTCCTCAGTCACCAGAGGACACACACAGGGGAGAAGCCCTATGTCTGCAGGGAGT  
GTGGGCGGGGCTTTAGCAATAAGTCACACCTCCTCAGACACCAGAGGACACACACAGGGGAGAAGCCCTAT  
GTCTGCAGGGAGTGTGGGCGGGGCTTTTCGCAATAAGTCACACCTCCTCAGACACCAGAGGACACACACAG  
GGAGAAGCCCTACGTCTGCAGGGAGTGTGGGCGGGGCTTTAGCGATAGGTCAAGCCTCTGCTATCACCAGA  
GGACACACACAGGGGAGAAGCCCTACGTCTGCAGGGAGGATGAGTAA

**DOT1L**

ATG **GGGGAGAAGCTGGAGCTC** AGACTGAAGTCGCCCGTGGGGGCTGAGCCCGCCGTCTACCCGTGGCCG  
CTGCCGGTCTAC **GATAAACATCACGATGCTGCTCATGAAATCATCGAGACCATCCG** ATGGGTCTGTGAAGAA  
ATCCCGGATCTCAAGCTCGCTATGGAGAATTACGTTTAAATTGACTATGACACCAAAG **CTTCGAGAGCATGC**  
**AGAGGCTCTGCGACAAGTACAACCGTGCCATCGACAGCATCCACCAGCTG** TGGAAGGGCACCACGCAGCCC  
ATGAAGCTGAACACGCGGCCGTCCACTGGACTCCTGCGCCATATCCTGCAGCAGGTCTACAACCACTCGGT  
GACCGACCCCGAGAAGCTCAACAACACTACGAGCCCTTCTCCCCGAGGTGTACGGGGAGACCTCCTTCGACC  
TGGTGGCCAGATGATTGATGAGATCAAGATGACCGACGACGACCTGTTTGTGGACTTGGGAGCG **GTGTG**  
**GGCCAGGTCGTGCTCCAGTTGCTGCTGCCACCAACTGCAAACATCACTATGGCGTCGAGAAAGCAGACAT**  
**CCCGCCAAGTATGCGGAG** ACCATGGACCGCGAGTTCAGGAAGTGGATGAAATGGTATGGAAAAAGCATG  
CAGAATACACAT **TGGAGAGAGGCGATTTCCTCTCAGAAGAGTGGAGGGAGCGAATCGCCAACACGAG** TGTT  
ATATTTGTG **ATAA** TTTTGCCTTTGGTCTGAGGTGGATCACCAGCTGAAGGAGCGGTTTCAAACATGAAGG

AAGGTGGCAGAATCGTGTCTCGAAACCCTTTGCACCTCTGAACTTCAGAATAAACAGTAGAACTTGAGTGA  
CATCGGCACCATCATGCGCGTGGTGGAGCTCTCGCCCTGAAGGGCTCGGTGTCTGGACGGGGAAGCCA  
GTCTCCTACTACCTGCACACTATCGACCGCACCATACTTGAAAACATTTTTCTAGTCTGAAAAACCCAAAAC  
CAGGGAGGAACAGGAGGCAGCCCGCGCCGCCAGCAGCGCGAGAGCAAGAGCAACGCGGCCACGCCAC  
TAAGGGCCAGAGGGCAAGGTGGCCGGCCCCGCCGACGCCCCATGACTCTGGTGTGAGGAAGAGAA  
GGCGGGAGCAGCCACCGTGAAGAAGCCGTCTCCCTCAAAGCCCGCAAGAAGAAGCTAAACAAGAAGGGG  
AGGAAGATGGCTGGCCGCAAGCGCGGGCGCCCAAGAAGATGAACACTGCGAACCCCGAGCGG **ACTGCA**  
**ACTGCACTGGATGCCCTGCACGCTCAGACCGTGTCTCAGACGGCGGCCTCTCACCCAG**  
GATGCCTACAGATCCCCTCACAGCCGTTCTACCAGCTACCTCCGAGCGTGCAGCGGCACTCCCCAACCC  
GCTGCTGGTGGCGCCACCCCGCCGCGCTGCAGAAGCTTCTAGAGTCTTCAAGATCCAGTACCTGCAGT  
TCCTGGCATAACAAAGACCCCCAGTACAAGGCCAGCCTGCAGGAGCTGCTGGGCCAGGAGAAGGAGAA  
GAACGCCAGCTCCTGGGTGCGGCTCAGCAGCTCCTCAGCCACTGCCAGGCCAGAAGGAGGAGATCAGG  
AGGCTGTTTACAGAAAAATTGGATGAGCTGGGTGTGAAGGCGCTGACCTACAACGACCTGATTCAAGCGCA  
GAAGGAGATCTCCGCCATAACCAGCAGCTGCGGGAGCAGTCCGAGCAGCTGGAGCAGGACAACCGCGCG  
CTCCGCGGCCAGAGCTTGCAGCTGCTCAAGGCTCGCTGCGAGGAGCTGCAGCTGGACTGGGCCACGCTGT  
CGCTGGAGAAGCTGTTGAAGGAGAAGCAGGCCCTGAAGAGCCAGATCTCGGAGAAGCAGAGGCCACTGCCT  
GGAGCTGCAGATCAGCATTGTGGAGCTAGAGAAGAGCCAGCGGCAGCAGGAGCTCCTGCAGCTCAAGTCTT  
GTGTGCCGCTGACGACGCCCTGTCCCTGCACCTGCGTGGGAAGGGCGCCCTGGGCCGCGAGCTGGAGC  
CTGACGCCAGCCGGCTGCACCTGGAGCTGGACTGCACCAAGTTCTCGCTGCCTCACTTGAAGCAGCATGAGC  
CCGGAGCTCTCCATGAACGGCCAGGCTGCTGGCTATGAGCTCTGCGGTGTCTGAGCCGGCCTTCGTGAA  
GCAGAACACGCCCCAGTACCTGGCCTCACCCCTGGACCAGGAGGTGGTGCCCTGTACCCCTAGCCACGTC  
GGCCGCGCGCCTGGAGAAGCTGTCTGGCCTAGCCGACCCGACTACACTAGGCTGTCCCCGGCCAAGA  
TTGTGCTGAGGCGGCACCTGAGCCAGGACCACACGGTGCCCGGCAGGCCGGCTGCCAGTGAGCTGCATTC  
GAGAGCTGAGCACACCAAGGAGAACGGCCTTCCCTACCAGAGCCCCAGCGTGCCTGGCAGCATGAAGCTG  
AGCCCTCAGGACCCGCGGCCCTGTCCCTGGGGCCTTGCACTTGTGGAGAGAAGAGCAGTGAGAAGG  
GCCTGAGAGAGCGCGCTACGGCAGCAGCGGGGAGCTCATCACCAGCCTGCCATCAGCATCCCGCTCAG  
CACCGTGCAGCCCAACAAGCTCCCGTGCAGATTCCCTGGCCAGCGTGGTGTGCCAGCCGCGCGCGAG  
AGGGCGAGGAGCACCCCAAGTCCCGTGTGCAGCCCGTGACCCCTCGTCCACACTTGAAGAGCAGATTG  
GTGCTAATGCCACGGTGTGGGAGCAGAAGCCTTGCCCTGGCCCCGCAGGCTTCTCCTACGCTGGCTC  
GGTGGCCATCAGCGGGGCTTGGCGGGCAGCCCGGCTCTCTCACACCTGGAGCCGAGCCGGCCACCTTG  
GATGAGTCTCCAGCTCTGGGAGCCTTTTTGCCACCGTGGGGTCCCGCAGCTCCACGCCACAGCACCCCT  
GCTGCTGGCACAGCCCCGAACTCGCTTCTGCTCTCCCGCCACCAGCTCTCCTCCAGTCCCCGGCTTG  
GTGGGGCCCGCCAGGGCCCGTTGCCCGAGGCCAGCAAGGGAGACCTGCCCTCCGATTCCGGCTTCTCAGA  
TCCTGAGAGTGAAGCCAAGAGGAGGATTGTGTTACCATCACCAGTGGTGGCGGAGTCCCAAGCAGTCCG  
CCTCCAGCAAGCACAGCCCCCTGACCGCCAGCGCCCGTGGGGACTGTGTGCCGAGCCACGGGCAGGACA  
GTCGCAGGCGCGGCCGGCGGAAGCGAGCATCTGCGGGGACGCCAGCTTGAGCGCAGGCGTGTCCCCCA  
AGCGCCGAGCCCTGCCGTCCGTGCTGGCCTTTTACACAGCCTTCGGGGTCTCCCTCAACCTCAACTCC  
ATGGTCAGTAACATCAACCAGCCCCTGGAGATTACAGCCATCTCGTCCCCGAGACCTCCCTGAAGAGCTCC  
CCTGTGCCCTACCAGGACCAGACCAGCCCCCGTGCTCAAGAAGGAGCGGCCTCTGAGCCAGACCAATG  
GGCACACTACTCCCCACTCACCTCAGACGAGGAGCCAGGCTCTGAGGACGAGCCAGCAGTGTCTCGAATT  
GAGAGAAAAATTGCAACAATCTCCTTAGAAAGCAAATCTCCCCGAAAACCTTGGAAAATGTGGTGGCTTG  
GCGGGAAGGAAGCCCGCGCCCGCCGGCGAGCCAGTCAATAGCAGCAAGTGGAAGTCCACCTTCTCGCCCA  
TCTCCGACATCGCCTGGCCAAGTGGCGGACAGCCCGCTGCAGGCCAGCTCCGCCCTCAGCCAGAAGTCC  
CCTGTTACAGTTCGGCCCCCGCTGGAGGAGCCCTCTGCCGATGCCAAGCTGGCCGCTCACCCAGGAAA  
GGCTTTCCCGCTCCCTGTGCGGGGCTGACGACTCAGCCCGGCCACCAACCCTGCCAACGGCTGCACCT  
TCGGCGGGGGCCTGGCCGCGGACCTGAGTTTACACAGCTTCAAGTATGGTGTCTTCTTCCCCACAAGGGC  
CCCGAGGCGGCCGCTGAGCTCCCCGCTGAGCTTCCCTCGCAGCGCGGCAAGGAGGGCTCGGACGCC  
AACCTTTCTGAGCAAGAGGCAGCTGGACGGCCTGGCTGGGCTGAAGGGCGAGGGCAGCCGCGGCAAG  
GAGGCAGGGGAGGGCGGCTACCGCTGTGCGGGCCACGGACAAGACCCCACTGCTGAGCGGCAAGGCC  
GCCAAGGCCCGGGACCGCGAGGTCGACCTCAAGAATGGCCACAACCTTTCATCTCTGCGGGCGCCGTGC  
CTCCCGGAAGCCTCCTCAGCGGCCCGCCCTGGCCCGGCGGCGTCTCCGAGGCGGCGCGGCGTCTCT  
CCGCCAGACGCACCGTCTTCTGGGCCCTTCCCGCCGGGACCGCAGTTCCGCTCGGCCATGTC  
CCTGCAGCCAACCTCGGCTCCGTGGCCGGCTCCTCCGTGCTGCAGTCCGTGTTAGCTCTGTGCCGGCC  
GCCGAGGCTGGTGCAGTGTCTGCTGCCACAGACTGACCAACTCGCACGCCATGGGCAGCTTTTC  
CGGGTGGCAGGCGGCACAGTTGGAGGTAAC**TAG**



## UBE2A

ATGTCCACCCGGCTCGGCGGCGCCTCATGCGGGACTTCAAGAGGTTGCAGGAGGATCCTCCAGCCGGAG  
TCAGCGGGGCTCCGTCCGAGAACAACATAATGGTGTGGAACGCGGTCAATTTTCGGGCCTGAAGGGACCCCG  
TTTGAGGATGGAACATTTAACTTACAATAGAATTCACTGAAGAATATCCAAATAAACCACCTACAGTTAGATT  
TGTCTCTAAGATGTTCCATCCAAATGTCTATGCAGATGGTAGTATATGTCTGGACATACTTCAGAACCGTTGG  
AGTCCAACCTATGATGTGTCTTCCATTCTAACATCCATACAGTCTCTGTTGGATGAACCCAATCCCAATAGTC  
CAGCAAACAGCCAGGCTGCTCAGCTGTACCAGGAGAACAACGGGAATATGAAAAGCGTGTCTTCTGCAATAG  
TAGAA CAAAGCTGAGTCACTCT
